# Supplementary material
Source: PubMed Central journal article supplement (PMC3438374)
Supplement: NIHMS391276-supplement-Supp_Fig_S1___Supp_Table_S1-S2.pdf [file NIHMS391276-supplement-Supp_Fig_S1___Supp_Table_S1-S2.pdf]

**P66, the  $\beta_3$ -Integrin Ligand of *Borrelia burgdorferi*, is Critical for Infection of Mice but not Ticks**

Laura C. Ristow<sup>1</sup>, Halli E. Miller<sup>2</sup>, Lavinia J. Padmore<sup>2</sup>, Rekha Chettri<sup>2</sup>, Nita Salzman<sup>3</sup>, Melissa J. Caimano<sup>4</sup>, Patricia A. Rosa<sup>5</sup>, and Jenifer Coburn<sup>1,2\*</sup>

<sup>1</sup>Graduate Program in Microbiology, Immunology, and Molecular Genetics, Medical College of Wisconsin, Milwaukee, WI

<sup>2</sup>Division of Infectious Diseases, Department of Medicine, Medical College of Wisconsin, Milwaukee, WI

<sup>3</sup>Division of Gastroenterology, Department of Pediatrics, Medical College of Wisconsin, Milwaukee, WI

<sup>4</sup>Department of Medicine, University of Connecticut Health Sciences Center, Farmington, CT

<sup>5</sup>Laboratory of Zoonotic Pathogens, National Institute of Allergy and Infectious Diseases, Rocky Mountain Laboratories, Hamilton, MT

\*Corresponding author: Center for Infectious Disease Research, 8701 Watertown Plank Rd., TBRC C3980, Milwaukee, WI 53228; phone: 414-955-4116, fax: 414-955-6567, e-mail:

[jacoburn@mcw.edu](mailto:jcoburn@mcw.edu)

Figure S1

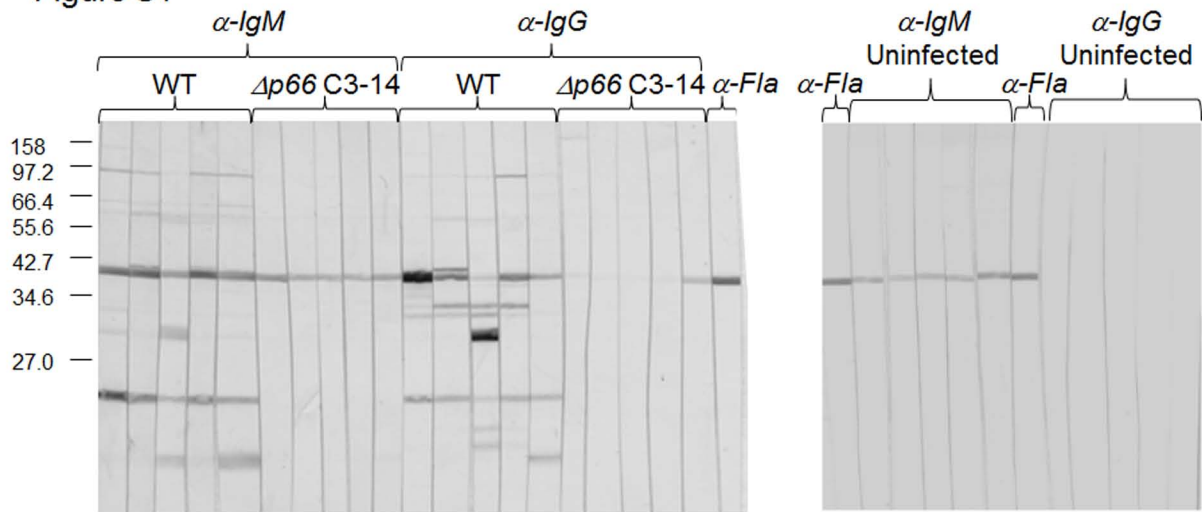

**Figure S1.** Serologic response to *B. burgdorferi* inoculation

Wild-type *B. burgdorferi* lysates were separated by SDS-PAGE on 12.5% acrylamide gels and transferred to Immobilon membranes. The membranes were cut into strips, and each strip was probed with an individual mouse serum as a primary antibody at a dilution of 1:100 for detection of IgM or 1:1,000 for detection of IgG. Sera from 5 mice per strain, WT or  $\Delta p66$ , at 2 weeks post-inoculation were analyzed, and sera from 5 control inoculated mice were analyzed as a control. Anti-mouse IgM or IgG antibodies conjugated to alkaline phosphatase at dilutions of 1:10,000 were used as secondary antibodies, and strips were developed using standard colorimetric protocols. Additional strips were probed with anti-flagellin as a primary antibody and detected with an anti-mouse IgG-AP conjugate.

Table S1: Bacterial strains and plasmids used in this study

| strain/vector                | genotype                                                                                                                                                                                     | source/reference                         |
|------------------------------|----------------------------------------------------------------------------------------------------------------------------------------------------------------------------------------------|------------------------------------------|
| <i>E. coli</i> JM109         | F' <i>traD36 proA<sup>+</sup>B<sup>+</sup> lacI<sup>f</sup> Δ(lacZ)M15/ Δ(lac-proAB) glnV44 e14 gyrA96 recA1 relA1 endA1 thi hsdR17</i>                                                      | Promega, Madison, WI, USA                |
| <i>E. coli</i> BLR           | F <sup>-</sup> <i>ompT hsdS<sub>B</sub>(r<sub>B</sub><sup>-</sup> m<sub>B</sub><sup>-</sup>) gal dcm</i>                                                                                     | Novagen (Merck KGaA), Darmstadt, Germany |
| <i>B. burgdorferi</i> B31-A3 | Transformable clonal derivative of the tick isolate B31; missing plasmid cp9                                                                                                                 | (Elias <i>et al.</i> , 2002)             |
| Δ <i>p66</i> clone 2.3       | B31-A3 derivative, <i>p66</i> replaced by kanamycin resistance cassette ( <i>p66::kan</i> ), missing plasmids cp9, cp32-3, lp21                                                              | this study                               |
| 2.3 <sup>cc</sup> clone 2    | Δ <i>p66</i> clone 2.3 with <i>p66</i> restored to endogenous locus on chromosome, gentamicin resistant, gent <sup>R</sup> in opposite direction to <i>p66</i> , restores P66 levels to WT   | this study                               |
| 2.3 <sup>cc</sup> clone 49   | Δ <i>p66</i> clone 2.3 with <i>p66</i> restored to endogenous locus on chromosome, gentamicin resistant, gent <sup>R</sup> in same direction as <i>p66</i> , restores P66 levels to WT       | this study                               |
| B31-A3 MC                    | plasmid-matched control for Δ <i>p66</i> clone 2.3, <i>p66</i> locus intact, missing plasmids cp9, cp32-3, lp21                                                                              | this study                               |
| Δ <i>p66</i> clone C3-14     | B31-A3 derivative, <i>p66::kan</i> , missing plasmid cp9                                                                                                                                     | this study                               |
| C3-14 <sup>cc</sup> clone 5  | Δ <i>p66</i> clone C3-14 with <i>p66</i> restored to endogenous locus on chromosome, gentamicin resistant, gent <sup>R</sup> in same direction as <i>p66</i> , restores P66 levels to WT     | this study                               |
| C3-14 <sup>cc</sup> clone 23 | Δ <i>p66</i> clone C3-14 with <i>p66</i> restored to endogenous locus on chromosome, gentamicin resistant, gent <sup>R</sup> in opposite direction to <i>p66</i> , restores P66 levels to WT | this study                               |
| C3-14 <sup>cp</sup> clone 13 | Δ <i>p66</i> clone C3-14 with <i>p66</i> restored on shuttle vector pBSV2G, gentamicin resistant, restores P66 levels to approximately 10 x WT                                               | this study                               |
| C3-14 <sup>cp</sup> clone 25 | Δ <i>p66</i> clone C3-14 with <i>p66</i> restored on shuttle vector pBSV2G, gentamicin resistant, restores P66 levels to approximately 10 x WT                                               | this study                               |
| C3-14 <sup>cp</sup> clone 34 | Δ <i>p66</i> clone C3-14 with <i>p66</i> restored on shuttle vector pBSV2G, gentamicin resistant, restores P66 levels to approximately 10 x WT                                               | this study                               |
| Δ <i>p66</i> clone C6-6      | B31-A3 derivative, <i>p66::kan</i> , missing plasmid cp9                                                                                                                                     | this study                               |
| C6-6 <sup>cc</sup> clone 11  | Δ <i>p66</i> clone C6-6 with <i>p66</i> restored to endogenous locus on chromosome, gentamicin resistant, gent <sup>R</sup> in same direction as <i>p66</i> , restores P66 levels to WT      | this study                               |
| C6-6 <sup>cc</sup> clone 46  | Δ <i>p66</i> clone C6-6 with <i>p66</i> restored to endogenous locus on chromosome, gentamicin resistant, gent <sup>R</sup> in opposite direction to <i>p66</i> , restores P66 levels to WT  | this study                               |
| pGEM T Easy                  | T/A cloning vector, encodes resistance to ampicillin                                                                                                                                         | Promega, Madison, WI, USA                |
| pBSV2G                       | shuttle vector for <i>E. coli</i> and <i>B. burgdorferi</i> , encodes resistance to gentamicin                                                                                               | (Elias <i>et al.</i> , 2003)             |
| p66KO4XS1                    | replaces <i>p66</i> integrin binding domain-encoding sequences with kanamycin resistance cassette, β-lactamase gene inactivated                                                              | (Coburn & Cugini, 2003)                  |

Table S2: Oligonucleotide primers, 5' → 3'

| Name          | Sequence                             | Purpose                                                                                  |
|---------------|--------------------------------------|------------------------------------------------------------------------------------------|
| obb0604m      | GAGAGCATGCCAACCTTAACAATACCTTTTGTACTG | Cloning of p66 region in pBSV2G REF and in pGEM T Easy (Promega, Madison, WI)            |
| obb602u       | TCTCGAGCTCGGTTGATCTTAGTAGTTCGGATCTC  | Cloning of p66 region in pBSV2G REF and in pGEM T Easy (Promega, Madison, WI)            |
| flgBMfe       | CAATTGTAATACCCGAGCTTCAAGGAAG         | Cloning of <i>flgBp-gent<sup>R</sup> (aacC1)</i> cassette in Mfe I site 3' of <i>p66</i> |
| aacC1Mfe      | CAATTGCGATCTCGGCTTGAACG              | Cloning of <i>flgBp-gent<sup>R</sup> (aacC1)</i> cassette in Mfe I site 3' of <i>p66</i> |
| FlaBpKanR3-2  | CGCAGGAACACTGCCAGCGCATCAAC           | screening for kanamycin resistance cassette                                              |
| FlaBpKanR5-2  | CATGGAGGAATGACATATGAGCCATATTC        | screening for kanamycin resistance cassette                                              |
| FlgBpGentR3-2 | AATTGTTAGGTGGCGGTACTTGGGTCG          | screening for gentamicin resistance cassette                                             |
| FlgBpGentR5-2 | AGGTTTCCATATGTTACGCAGCAGCAAC         | screening for gentamicin resistance cassette                                             |
| OLCR01        | ATG CCT TGA TTA CGC TGG AG           | sequencing of <i>p66</i> locus                                                           |
| OLCR02        | TGC TCC CCA GTT ACA GTT CC           | sequencing of <i>p66</i> locus                                                           |
| OLCR03        | AAC TTG AAT CTG ATG GTT ATG AAG C    | sequencing of <i>p66</i> locus                                                           |
| OLCR04        | AAC CTC ATC ATC GCT AGC AC           | sequencing of <i>p66</i> locus                                                           |
| OLCR05        | ATT TGC AAG GAA AGA AAT ATA AGG      | sequencing of <i>p66</i> locus                                                           |
| OLCR06        | TGT TGA AAT GGA TGC TAT TGG          | sequencing of <i>p66</i> locus                                                           |
| OLCR07        | TTG AAG ATG CAA TGA AAC TCG          | sequencing of <i>p66</i> locus                                                           |
| OLCR08        | GGG ATT ATA AAT GGA TTA GGA TGG      | sequencing of <i>p66</i> locus                                                           |
| OLCR09        | TGC ATT TTC AAC AGG AGC AA           | sequencing of <i>p66</i> locus                                                           |
| OLCR10        | TCA AGA GAA TGA CAA AGA CAC TCC      | sequencing of <i>p66</i> locus                                                           |
| OLCR11        | TTT CAA ACC CAG GAA CAA GC           | sequencing of <i>p66</i> locus                                                           |
| OLCR12        | AGC AAT CCT GTT GCT AAA ATG          | sequencing of <i>p66</i> locus                                                           |
| OLCR13        | TTA ATC TTG ATA TTG CAA CAA TGC      | sequencing of <i>p66</i> locus                                                           |
| OLCR14        | GGA TTA TCT CTC CGG GCT TC           | sequencing of <i>p66</i> locus                                                           |
| OJLC29        | ATA AAG GAT TCC TTG ATA TGT TTT ATT  | sequencing of <i>p66</i> locus                                                           |

|             |                                     |                                |
|-------------|-------------------------------------|--------------------------------|
| OJLC32      | CAC TAA AAG CGG AAG GCA AAA AAG GC  | sequencing of <i>p66</i> locus |
| OJLC35      | CGC CCA GGA TTC TTT TTC ACC GGT A   | sequencing of <i>p66</i> locus |
| ONN660      | AAT ATG GCC TTG AAT TTT TAC CTA ATA | sequencing of <i>p66</i> locus |
| SP6         | GAT TTA GGT GAC ACT ATA G           | sequencing of <i>p66</i> locus |
| T7 promoter | TAA TAC GAC TCA CTA TAG GG          | sequencing of <i>p66</i> locus |
